# Supplementary material for: Gel electrophoretic and liquid chromatographic methods for the identification and authentication of cave and house edible bird's nests from common adulterants
Source: Royal Society of Chemistry journal article supplement (doi:10.1039/c5ay02170g), 2015-11-25
Supplement: c5ay02170g1.pdf [file c5ay02170g1.pdf]

### **Supplementary Information**

## **Gel Electrophoretic and Liquid Chromatographic Methods for the Identification and Authentication of Cave and House Edible Bird's Nests from Common Adulterants**

**\*Lee Ting Hun<sup>1</sup>, Waseem A. Wani<sup>1</sup>, Heng Yong Poh<sup>1</sup>, Umair Baig<sup>2</sup>, Eddie Tan Ti Tjih<sup>3</sup>, Noor Idayu Nashiruddin<sup>1</sup>, Yong Ee Ling<sup>4</sup> and Ramlan Abdul Aziz<sup>1</sup>**

**<sup>1</sup>Institute of Bioproduct Development,  
Universiti Teknologi Malaysia, 81310 Johor Bahru, Malaysia**

**<sup>2</sup>Center of Excellence for Scientific Research Collaboration with MIT, King Fahd University  
of Petroleum and Minerals, Dhahran 31261, Saudi Arabia**

**<sup>3</sup>Food Technology Programme, Faculty of Applied Sciences, Universiti Teknologi MARA,  
40450 Shah Alam, Selangor, Malaysia**

**<sup>4</sup>Institute of Environment and Water Resources Management, Department of  
Environmental Engineering, Faculty of Civil Engineering, Universiti Teknologi Malaysia,  
Johor Bahru, Malaysia**

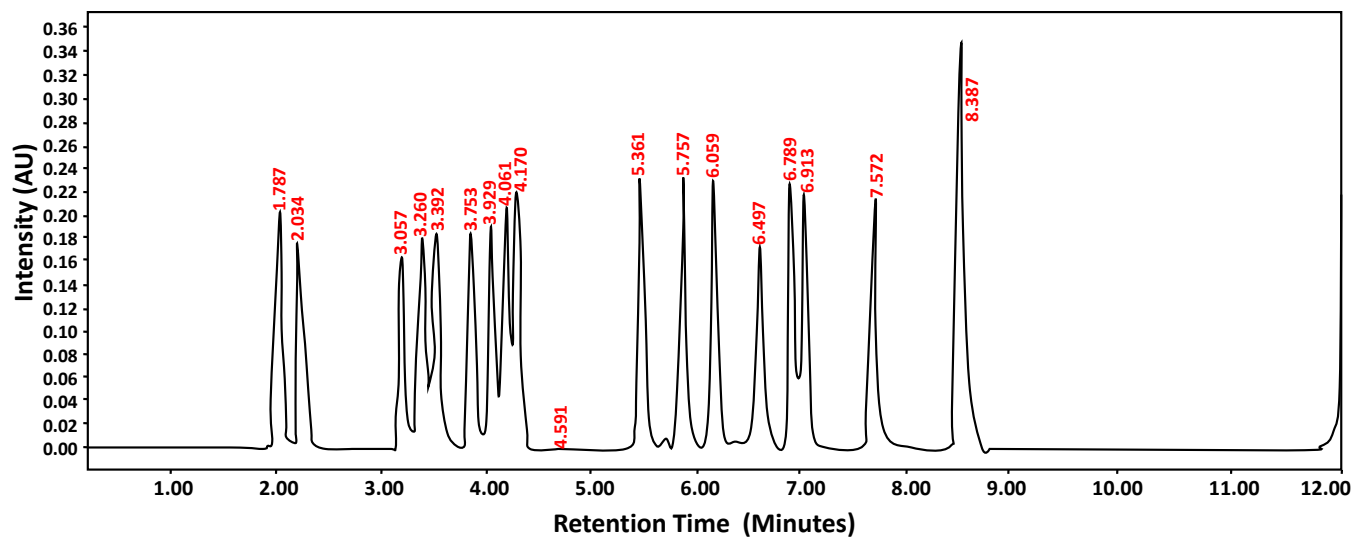

Fig. S1: HPLC chromatogram of amino acid standard.

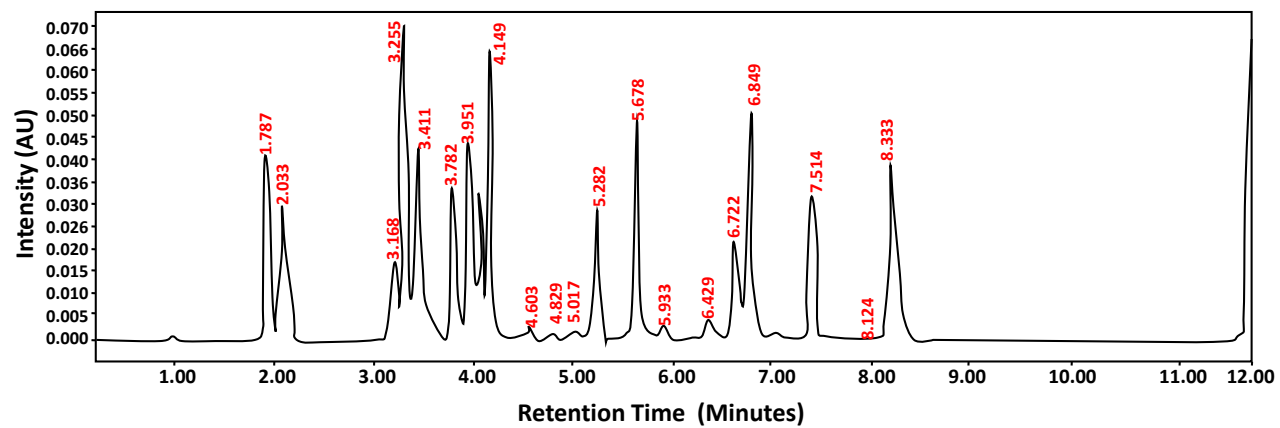

Fig. S2: Amino acid profile of cave nest.

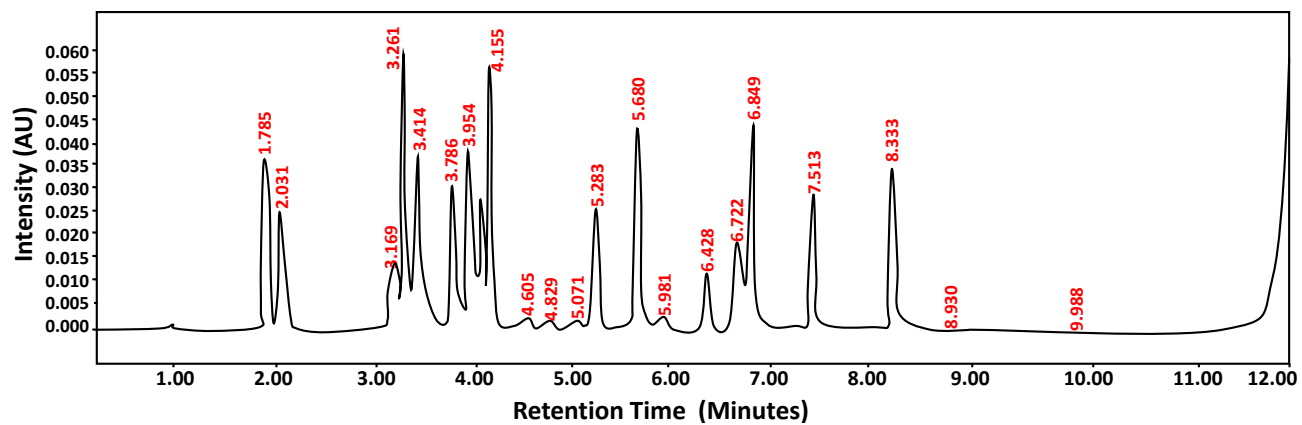

Fig. S3: Amino acid profile of house nest.

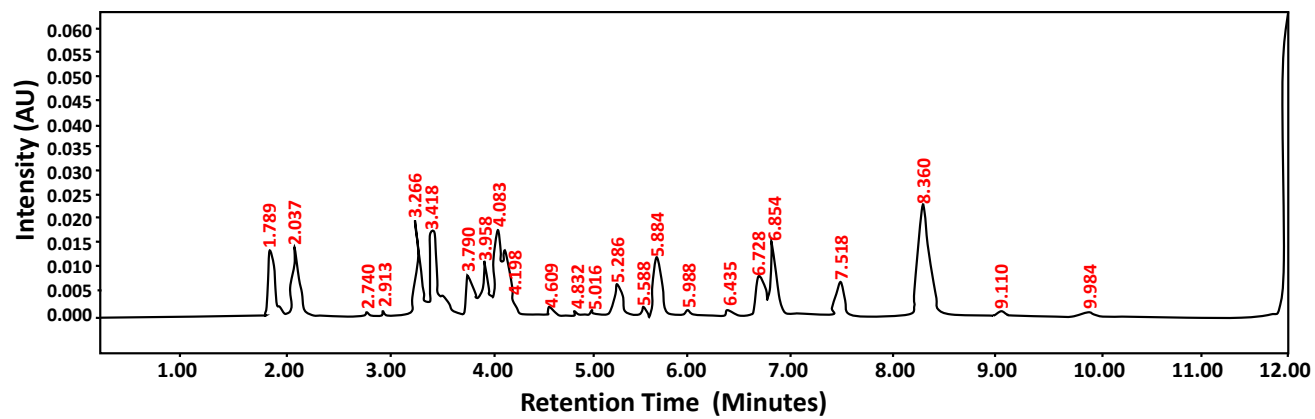

Fig. S4: Amino acid profile of white fungus.

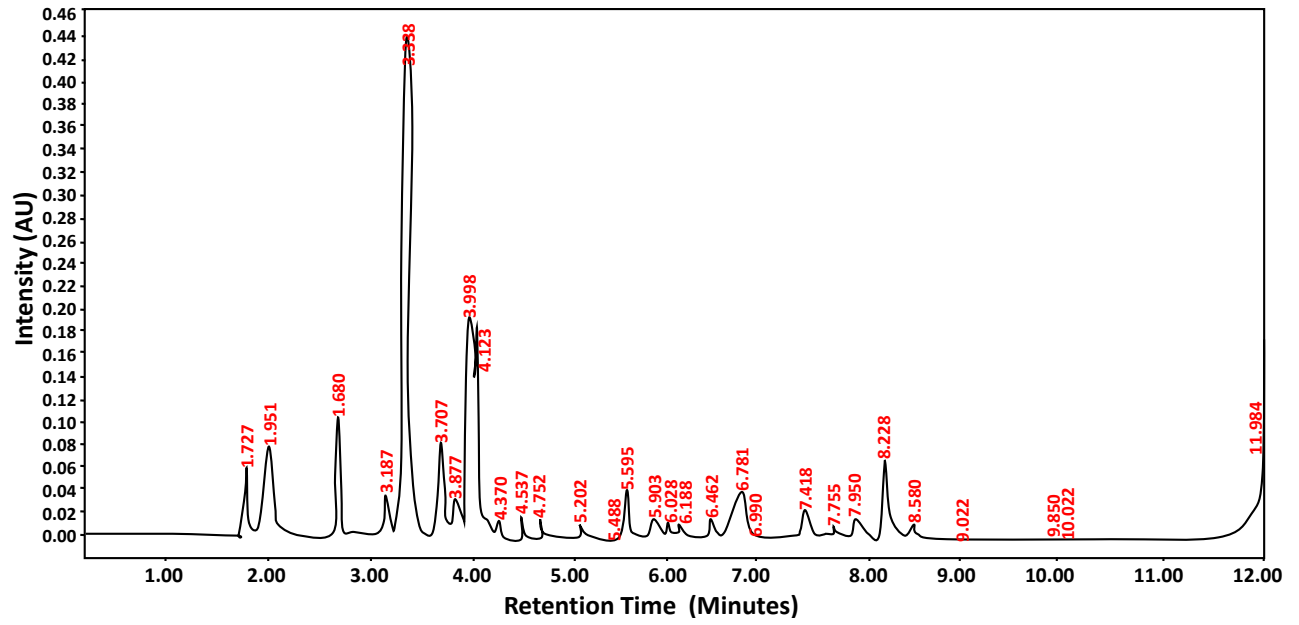

**Fig. S5:** Amino acid profile of fish swimming bladder.

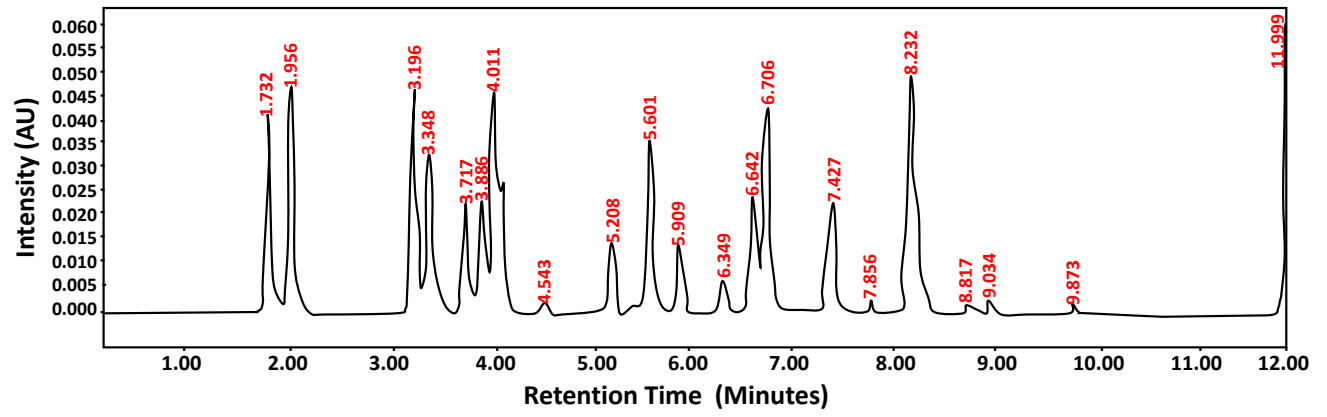

Fig. S6: Amino acid profile of egg white.

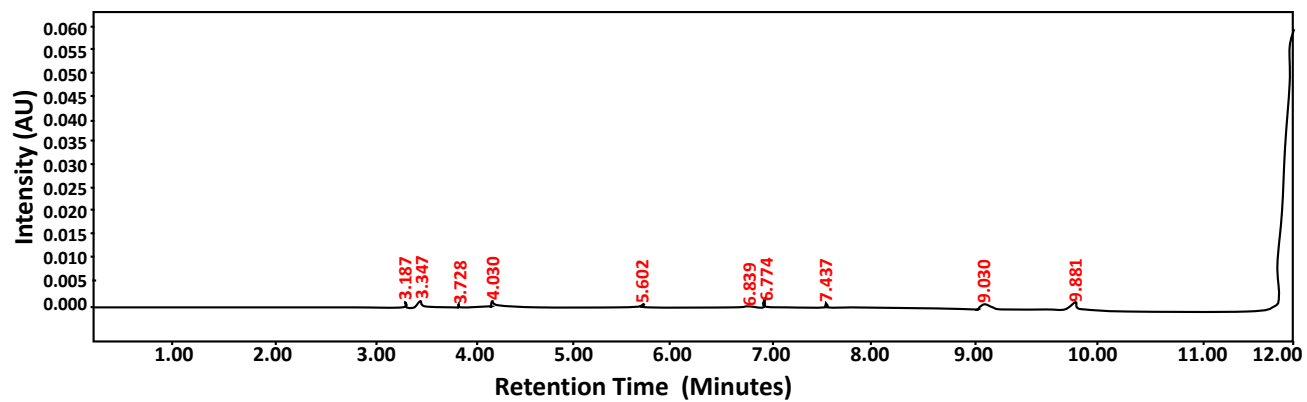

Fig. S7: Amino acid profile of jelly.
